# Supplementary material
Source: PubMed Central journal article supplement (PMC3468327)
Supplement: NIHMS409946-supplement-Bio-Sketches.pdf [file NIHMS409946-supplement-Bio-Sketches.pdf]

## Bio-Sketches

**David R Williams** is the Florence and Laura Norman Professor of Public Health and Professor of African and African American Studies and of Sociology at Harvard University. His scholarly interests have focused on the trends and determinants of socioeconomic and racial disparities in health, the effects of racism on health and the ways in which religious involvement can affect health. He recently served as the staff director of the Robert Wood Johnson Foundation Commission to Build a Healthier America.

**Michelle Judith Sternthal** is a Post-Doctoral Research Fellow in the Department of Environmental Epidemiology at Harvard School of Public Health. Her research focuses on social determinants of physical and mental health, using a life course perspective, and their connection to racial and socioeconomic health disparities. Her most recent research explores the biosocial pathways through which cumulative exposure to stress impacts childhood asthma susceptibility and onset.
